# Supplementary material
Source: publisher figshare collection journal article supplement (https://tandf.figshare.com/ndownloader/files/15615062)
Supplement: Supplementary file 1 [file 15615062]

**Synthesis, Self-Assembly, and Photomechanical Actuator Performance of a Sequence-Defined Polyviologen Crosslinker**

Abigail O. Delawder,‡ Anusree Natraj,‡ Nathan D. Colley, Tiana Saak, Angelique F. Greene, Jonathan C. Barnes*

*Department of Chemistry, Washington University in St. Louis, St. Louis, MO 63130, USA*

*E-mail: [jcbarnes@wustl.edu](mailto:jcbarnes@wustl.edu)

*‡ These authors contributed equally*

***Table of Contents
Section A. Materials / General Methods / Instrumentation*** *-------------------------------------------------------* ***S3***

***Section B. Synthetic Protocols*** *--------------------------------------------------------------------------------------------* ***S4***

1. ***2V•2PF6 S4***
2. ***2V•4PF6 S4***
3. ***4V•6PF6  S5***
4. ***4V•8PF6  S6***
5. ***6V•10PF6 S6***
6. ***6V–St•10PF­6•2Cl, 6V–St •12Cl S7***
7. ***6V-St•12PF­6  S8***

***Section C. Spectroscopic Characterisation*** *---------------------------------------------------------------------------* ***S9***

1. ***Nuclear Magnetic Resonance (1H) S9***
2. ***UV-Vis-NIR S10***
3. ***Gel Permeation Chromatography S12***

***Section D. Electrochemical Characterisation*** *-----------------------------------------------------------------------* ***S12***

***Section E. Thermal Characterisation*** *-----------------------------------------------------------------------------------* ***S12***

1. ***Differential Scanning Calorimetry (DSC) S12***
2. ***Thermogravimetric Analysis (TGA) S13***

***Section F. Gel Preparation, Photochemical Reduction, Actuation, and Mechanical Properties*** *----* ***S13***

1. ***General Procedure for the Preparation of Gels S13***
   1. ***Organogels S13***
   2. ***Hydrogels S14***
2. ***Calculations of Crosslinking Density, Swelling ratio, and Mc S14***
3. ***As-Synthesised, Swollen Rheology S15***
4. ***Photochemical Reduction of Gels: Procedure, Kinetics, and Rheology S15***

***Section G. References*** *------------------------------------------------------------------------------------------------------* ***S17***

**Section A. Materials / General Methods / Instrumentation**

All reagents were purchased from commercial suppliers and used without further purification unless stated otherwise. The chemical and photochemical reduction of polyviologens and gels was performed under an inert atmosphere of UHP nitrogen**.** All nuclear magnetic resonance (NMR) spectra were recorded on Varian Inova-500 with working frequencies of 500 (1H) and 125 (13C) MHz. Chemical shifts are reported in ppm relative to the signals corresponding to the residual non-deuterated solvent: (CD3)2SO: *δH* = 2.50 ppm and *δC* = 39.52 ppm. Ultraviolet-Visible-Near Infrared (UV-Vis-NIR) absorbance spectra were recorded on an Agilent Cary 5000 spectrophotometer with a PbSmart NIR detector. Infrared spectroscopy (IR) was performed on a Bruker Alpha Platinum ATR FT-IR spectrometer. Electrochemical measurements were obtained with a Gamry multipurpose potentiostat with a Ag/AgCl reference electrode, glassy carbon working electrode, platinum wire auxiliary electrode, and 0.1 M KCl or TBAPF6 as the supporting electrolyte. Size exclusion chromatography (SEC) analyses were performed on an Agilent 1260 Infinity setup with three PSS NOVEMA MAX Lux analytical 100 Å columns in tandem and 0.025 M Na2SO4 in H2O mobile phase run at 23 °C. The differential refractive index (dRI) of each compound was monitored using a Wyatt Optilab T-rEX detector and the light scattering (LS) of each compound was monitored using a Wyatt Dawn Heleos-II detector. High-Res Mass Spectrometry (HRMS) was recorded on a Bruker maXis 4G UHR-TOF mass spectrometer. Frequency sweep (1.0% strain, 0.1 to 30 rad s–1) and strain sweep (1 rad s–1, 0−50% strain) experiments were performed on a TA AR-G2 Oscillatory Shear Rheometer with 20 mm geometry with 0.5 N of normal force applied to gels before acquisition. Thermogravimetric analysis (TGA) was performed on a TA Instruments TGA5000 and differential scanning calorimetry (DSC) was performed on a TA instruments DSC2500. Photochemical reduction of the viologen-based gels using [Ru(bpy)3]Cl2 and triethanolamine (TEOA) was accomplished using two Hampton Bay desk lamp with ABI LED Aquarium light bulbs (450 nm / 12 Watt / 740 lumens). To aid in the precipitation of viologen-based compounds from their crude reaction mixtures, a Thermo Scientific Sorvall ST 8 small benchtop centrifuge was employed.

**Section B. Synthetic Protocols**

***
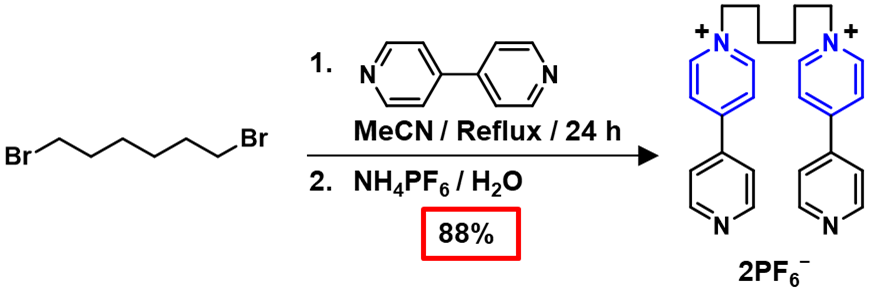
Synthesis of 2V•2PF6***

1,6-Dibromohexane(2.5 g, 1.58 mL, 10.25 mmol, 1 equiv) and 4,4ʹ-bipyridine (32.0 g, 205 mmol, 20 equiv) were dissolved in MeCN (250 mL) and heated to reflux for 24 h. The resulting yellow solid was filtered and washed with PhMe to remove remaining starting materials. The solid was dissolved in a minimal amount of H2O (~100 mL) and NH4PF6 (5.01g, 30.75 mmol, 3 equiv) was added to precipitate the compound. The solid was filtered, washed with copious amounts of H2O, and dried overnight to yield **2V•**2PF6as an off-white solid (6.22 g, 88% yield). 1H NMR (500 MHz, (CD3)2SO): *δH* 9.21 (d, *J* = 6.6 Hz, 4H); 8.88 (d, *J* = 5.6 Hz, 4H); 8.64 (d, *J* = 6.6 Hz, 4H); 8.03 (d, *J* = 5.8 Hz, 4H); 4.63 (t, *J* = 7.3 Hz, 4H); 1.98 (p, *J* = 7.2 Hz, 4H); 1.38 (p, *J* = 3.6 Hz, 4H). 13C NMR (125 MHz, (CD3)2SO): *δC* 152.35, 150.98, 145.25, 140.83, 125.37, 121.87, 60.30, 30.36, 24.88. HRMS-ESI for **2V•**2PF6; Calcd for C26H28F6N4P : m/z = 541.1950 [M – PF6]+ ; Found: 541.1920 [M – PF6]+.


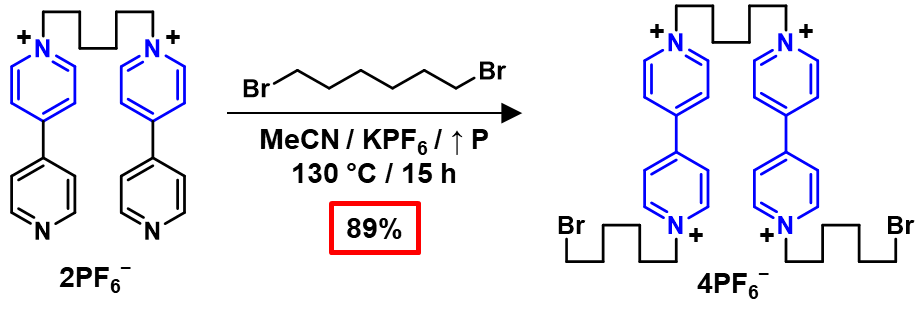
***Synthesis of 2V•4PF6***

**2V•**2PF6(1.0 g, 1.46 mmol, 1 equiv), 1,6-dibromohexane (10.7 g, 6.72 mL, 43.71 mmol, 30 equiv) and KPF6(1.61 g, 8.74 mmol, 6 equiv) were dissolved in dry MeCN (29 mL, 35 mg/mL **2V•**2PF6) and heated to 130 °C in a 100 mL high pressure vessel while stirring for 15 h. The reaction vessel was cooled to room temperature and the solution was decanted into four 50 mL centrifuge tubes and diluted to 50 mL with PhMe. The tubes were centrifuged at 4500 rpm for 2 min. The solution was decanted away, the solid was re-dissolved in a minimal amount of MeCN and diluted to 50 mL with PhMe. The previous two steps were repeated three times. The solid was filtered, dried with Et2O, sonicated in H2O to remove the remaining unwanted salts, and dried again with Et2O to yield **2V•**4PF6as an off-white solid (1.70 g, 89% yield). 1H NMR (500 MHz, (CD3)2SO): *δH* 9.36 (m, 8H); 8.76 (m, 8H); 4.69 (t, *J* = 7.5 Hz, 8H); 3.54 (t, *J* = 6.7 Hz, 4H); 2.08 – 1.94 (m, 8H); 1.82 (p, *J* = 6.7 Hz, 4H); 1.41 (m, 12H). 13C NMR (125 MHz, (CD3)2SO): *δC* 148.70, 148.60, 145.76, 145.71, 126.56, 60.89, 60.83, 34.96, 31.89, 30.51, 30.46, 26.88, 24.92, 24.54. HRMS-ESI for **2V•**4PF6; Calcd for C38H52Br2F12N4P2 : m/z = 507.0905 [M – 2PF6]2+ ; Found: 507.0884 [M – 2PF6]2+.

***
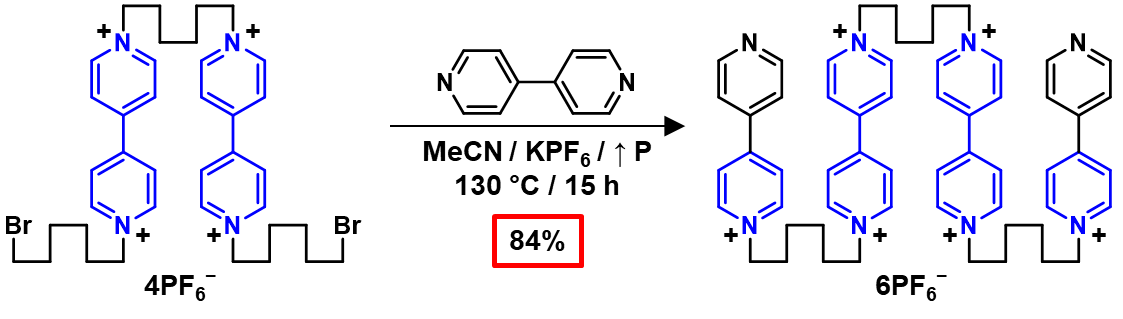
Synthesis of 4V•6PF6***

**2V•**4PF6(1.0 g, 0.767 mmol, 1 equiv), 4,4ʹ-bipyridine (3.59 g, 23.01 mmol, 30 equiv), and KPF6(847 mg, 4.602 mmol, 6 equiv) were dissolved in dry MeCN (29 mL, 35 mg/mL **2V•**4PF6) and heated to 130 °C in a 100 mL high pressure vessel while stirring for 15 h. The reaction vessel was cooled to room temperature and the solution was decanted into four 50 mL centrifuge tubes and diluted to 50 mL with PhMe. The tubes were centrifuged at 4500 rpm for 2 min. The solution was decanted away, the solid was re-dissolved in a minimal amount of MeCN and diluted to 50 mL with PhMe. The previous two steps were repeated three times. The solid was filtered, dried with Et2O, sonicated in H2O to remove the remaining unwanted salts, and dried again with Et2O to yield **4V•**6PF6 as an off-white solid (1.132 g, 84% yield). 1H NMR (500 MHz, (CD3)2SO): *δH* 9.36 (d, *J* = 6.3 Hz, 8H); 9.22 (d, *J* = 6.9 Hz, 4H); 8.91 (d, *J* = 6.2 Hz, 4H); 8.76 (d, *J* = 5.4 Hz, 8H); 8.65 (d, *J* = 6.9 Hz, 4H); 8.08 (d, *J* = 6.2 Hz, 4H); 4.73 – 4.60 (m, 12H); 1.99 (m, 12H); 1.46 – 1.34 (m, 12H).13C NMR (125 MHz, (CD3)2SO): *δC* 150.41, 145.73, 145.28, 126.52, 125.46, 122.15, 60.80, 60.32, 30.53, 30.49, 30.40, 25.01, 24.98, 24.90. HRMS-ESI for **4V•**6PF6; Calcd for C58H68F24N8P4 : m/z = 728.2062 [M – 2PF6]2+ ; Found: 728.2060 [M – 2PF6]2+.

*
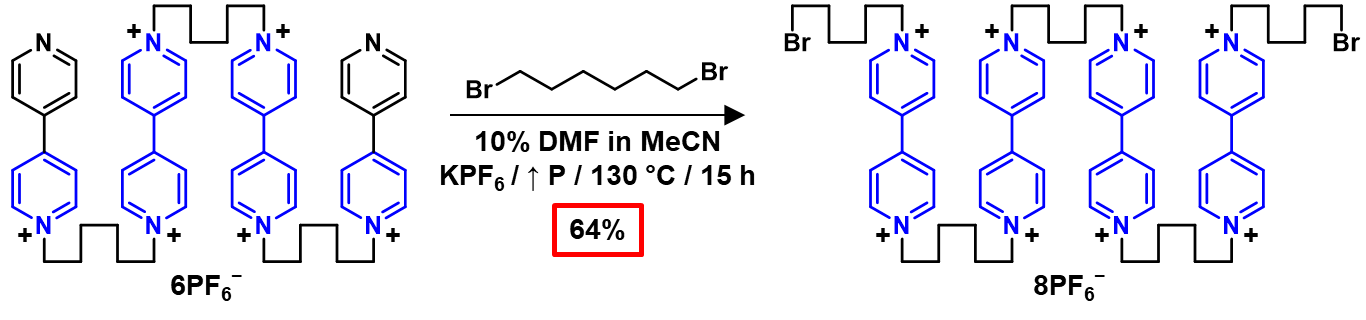
****Synthesis of 4V•8PF6***

**4V•**6PF6(3.00 g, 1.72 mmol, 1 equiv), 1,6-dibromohexane(16.79 g, 10.60 mL, 68.8 mmol, 40 equiv), and KPF6(1.90 g, 10.32 mmol, 6 equiv) were dissolved in 10% DMF in MeCN (dry, 60 mL total, 50 mg/mL **4V•**6PF6) and heated to 130 °C in a 250 mL high pressure vessel while stirring for 15 h. The reaction vessel was cooled to room temperature, the reaction mixture was filtered, and the solute was transferred into eight 50 mL centrifuge tubes and diluted to 50 mL with Et2O. The tubes were centrifuged at 4500 rpm for 2 min. The solution was decanted away, the solid was re-dissolved in a minimal amount of MeCN and diluted to 50 mL with Et2O. The previous two steps were repeated three times. The solid was filtered, dried with Et2O, sonicated in H2O to remove the remaining unwanted salts, and dried again with Et2O to yield **4V•**8PF6 as a light brown solid (2.61 g, 64% yield). 1H NMR (500 MHz, (CD3)2SO): *δH* 9.37 (m, 16H); 8.76 (m, 16H); 4.68 (t, *J* = 7.3 Hz, 16H); 3.54 (t, *J* = 6.6 Hz, 4H); 2.00 (m, 16H); 1.82 (m, 4H); 1.50 – 1.29 (m, 20H).13C NMR (125 MHz, (CD3)2SO): *δC* 148.60, 145.72, 126.54, 60.86, 60.79, 34.95, 31.87, 30.51, 30.49, 26.87, 24.98, 24.96, 24.53. HRMS-ESI for **4V•**8PF6; Calcd for C70H92Br2F30N8P5 : m/z = 643.1328 [M – 3PF6]3+ ; Found: 643.1306 [M – 3PF6]3+.


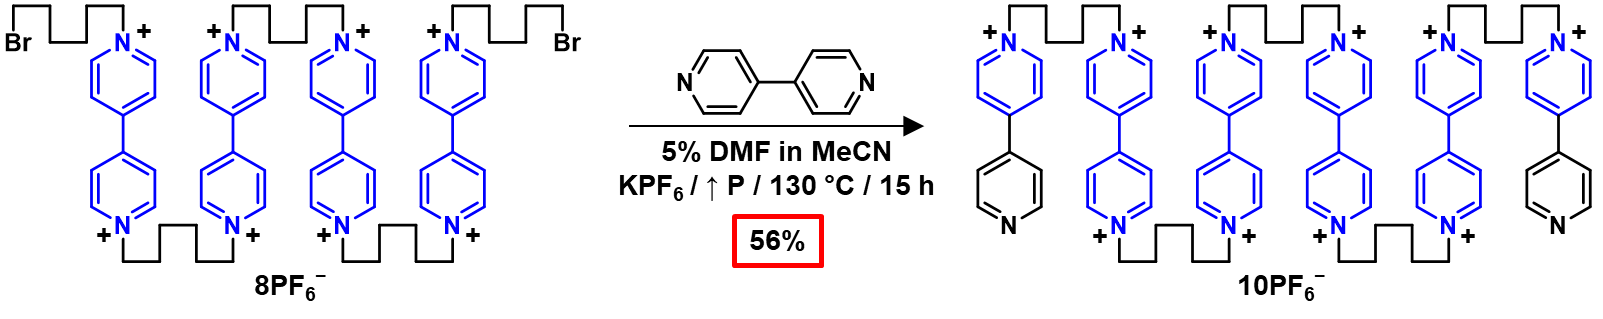
***Synthesis of 6V•10PF6***

**4V•**8PF6(500 mg, 0.2114 mmol, 1 equiv), 4,4ʹ-bipyridine(991 mg, 6.34 mmol, 30 equiv), and KPF6(233 mg, 1.27 mmol, 6 equiv) were dissolved in 5% DMF in MeCN (dry, 10 mL total, 50 mg/mL **4V•**8PF6) and heated to 130 °C in a 40 mL high pressure vessel while stirring for 15 h. The reaction vessel was cooled to room temperature, the reaction mixture was filtered, and the filtrate was transferred into six 15 mL centrifuge tubes and diluted to 15 mL with Et2O. The tubes were centrifuged at 4500 rpm for 2 min. The solution was decanted away, the solid was re-dissolved in a minimal amount of MeCN and diluted to 15 mL with Et2O. The previous two steps were repeated three times. The solid was filtered, dried with Et2O, sonicated in H2O to remove the remaining unwanted salts, and dried again with Et2O to yield **6V•**10PF6as a light brown solid (330 mg, 56% yield). 1H NMR (500 MHz, (CD3)2SO): *δH* 9.36 (m, 16H); 9.22 (d, *J* = 6.9 Hz, 4H); 8.90 (dd, *J* = 4.6, 1.6 Hz, 4H); 8.77 (m, 16H); 8.64 (d, *J* = 6.9 Hz, 4H); 8.07 (dd, *J* = 4.6, 1.6 Hz, 4H); 4.73 – 4.61 (m, 20H); 2.06 – 1.94 (m, 20H); 1.47 – 1.35 (m, 20H).13C NMR (125 MHz, (CD3)2SO): *δC* 152.24, 150.63, 148.63, 145.73, 145.27, 141.26, 126.53, 125.44, 122.06, 60.82, 60.33, 30.52, 30.47, 30.40, 24.99, 24.96, 24.89. HRMS-ESI for **6V•**10PF6; Calcd for C90H108F42N12P7 : m/z = 790.5432 [M – 3PF6]3+ ; Found: 790.8784 [M – 3PF6]3+.


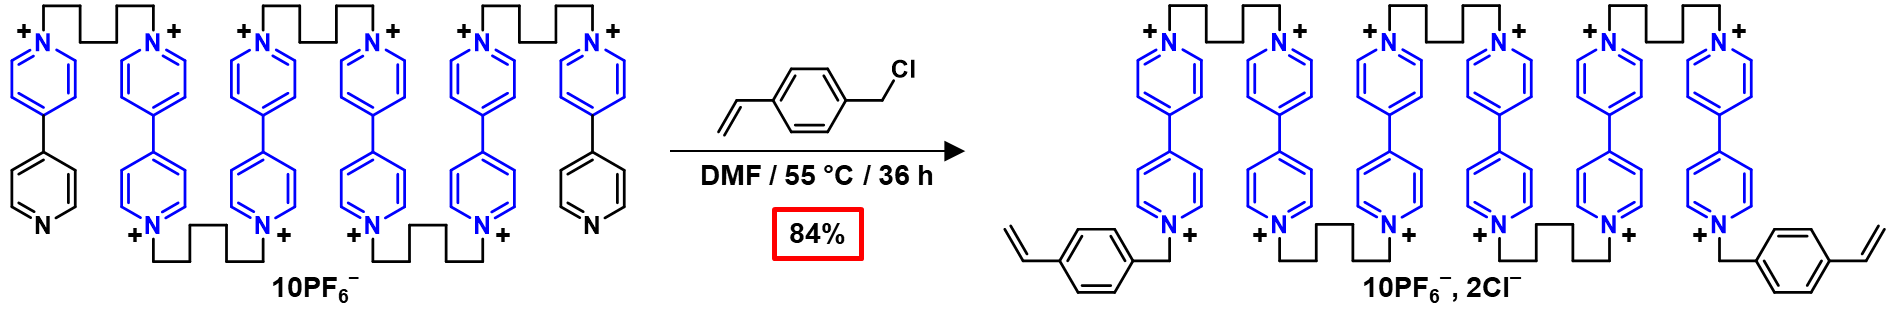
***Synthesis of 6V–St •10PF­6•2Cl***

**6V•**10PF6(1 g, 0.356 mmol, 1 equiv) and 4-vinylbenzyl chloride (2.72 g, 2.51 mL, 17.80 mmol, 50 equiv) were dissolved in DMF (dry, 20 mL, 50 mg/mL **6V•**10PF6) and heated to 55 °C for 36 h. The reaction vessel was cooled to room temperature and the solution was transferred into four 50 mL centrifuge tubes and diluted to 50 mL with Et2O. The tubes were centrifuged at 4500 rpm for 2 min. The solution was decanted away, the solid was re-dissolved in a minimal amount of DMF and diluted to 50 mL with Et2O. The previous two steps were repeated three times. The solid was filtered, dried with Et2O to yield **6V–St•**10PF­6•2Cl as a light brown solid (928 mg, 84% yield). 1H NMR (500 MHz, (CD3)2SO): *δH* 9.54 (d, *J* = 6.0 Hz, 4H); 9.51 – 9.41 (m, 20H); 8.89 – 8.70 (m, 24H); 7.59 (dd, *J* = 20.4, 8.1 Hz, 8H); 6.75 (dd, *J* = 17.6, 11.0 Hz, 2H); 5.95 (s, 4H); 5.90 (d, *J* = 17.6 Hz, 2H); 5.33 (d, *J* = 10.9 Hz, 2H); 4.77 – 4.67 (m, 20H); 2.08 – 1.92 (m, 20 H); 1.49 – 1.35 (m, 20H).13C NMR (125 MHz, (CD3)2SO): *δC* 149.14, 148.67, 148.57, 145.79, 145.70, 138.30, 135.76, 133.47, 129.33, 127.08, 126.88, 126.67, 126.55, 115.83, 63.17, 60.68, 30.47, 24.86. HRMS-ESI for **6V–St•**10PF62Cl; Calcd for C108H126F48N12P8 : m/z = 687.9344 [M – 2Cl – 2PF6]4+ ; Found: 687.9346 [M – 2Cl – 2PF6]4+. **6V–St•**10PF­6•2Cl was converted to **6V–St•**12Cl for spectroscopic characterization by the addition of excess tetrabutylammonium chloride (TBACl) in MeCN and several washes with MeCN.

***Synthesis of 6V-St•12PF6***

**Note**: This modified synthesis of the macrocrosslinker was added post-review. Using this protocol, complete conversion to the final product was obtained as the all PF6– salt. However, the gels reported herein were prepared using **6V–St**•10PF6•2Cl.


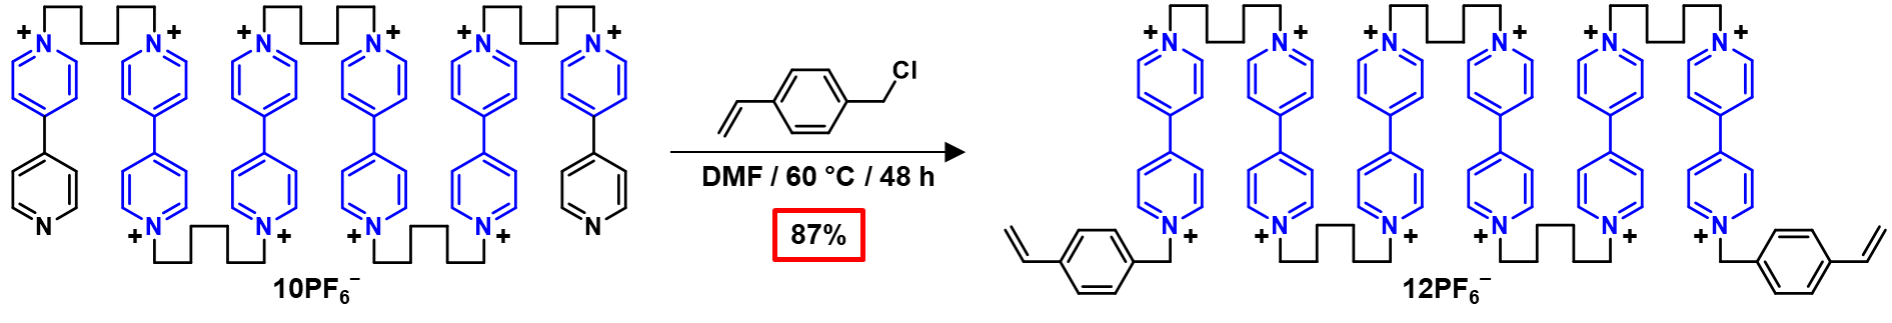


**6V•**10PF6(500 mg, 0.178 mmol, 1 equiv), 4-vinylbenzyl chloride (1.36 g, 1.25 mL, 8.90 mmol, 50 equiv), and KPF6 (197 mg, 1.07 mmol, 6 equiv) were dissolved in DMF (dry, 10 mL, 50 mg/mL **6V•**10PF6) and heated to 60 °C for 48 h. The reaction vessel was cooled to room temperature and the solution was transferred into four 50 mL centrifuge tubes and diluted to 50 mL with Et2O. The tubes were centrifuged at 4500 rpm for 2 min. The solution was decanted away, the solid was re-dissolved in a minimal amount of DMF and diluted to 50 mL with Et2O. The previous two steps were repeated three times. The solid was filtered, dried with Et2O, sonicated in H2O to remove the remaining unwanted salts, and dried again with Et2O to yield **6V–St•**12PF6as a light brown solid (517 mg, 87% yield). 1H NMR (500 MHz, (CD3)2SO): *δH* 9.49 (d, *J* = 6.1 Hz, 4H), 9.42 – 9.30 (m, *J* = 9.8 Hz, 20H), 8.83 – 8.69 (m, 24H), 7.59 (s, 8H), 6.76 (dd, *J* = 17.6, 11.0 Hz, 2H), 5.93 (s, 4H), 5.91 (d, *J* = 18.6 Hz, 2H), 5.34 (d, *J* = 10.9 Hz, 2H), 2.12 – 1.89 (m, 20H), 1.51 – 1.32 (m, 20H). 13C NMR (125 MHz, (CD3)2SO): *δC* 148.63, 148.61, 145.73, 145.69, 138.33, 135.75, 133.43, 129.31, 127.07, 126.89, 126.67, 126.53, 115.85, 63.28, 60.80, 30.54, 30.53, 30.52, 30.50, 30.48, 30.46, 25.00, 24.99, 24.96.

***Section C. Spectroscopic Characterisation***

1. ***
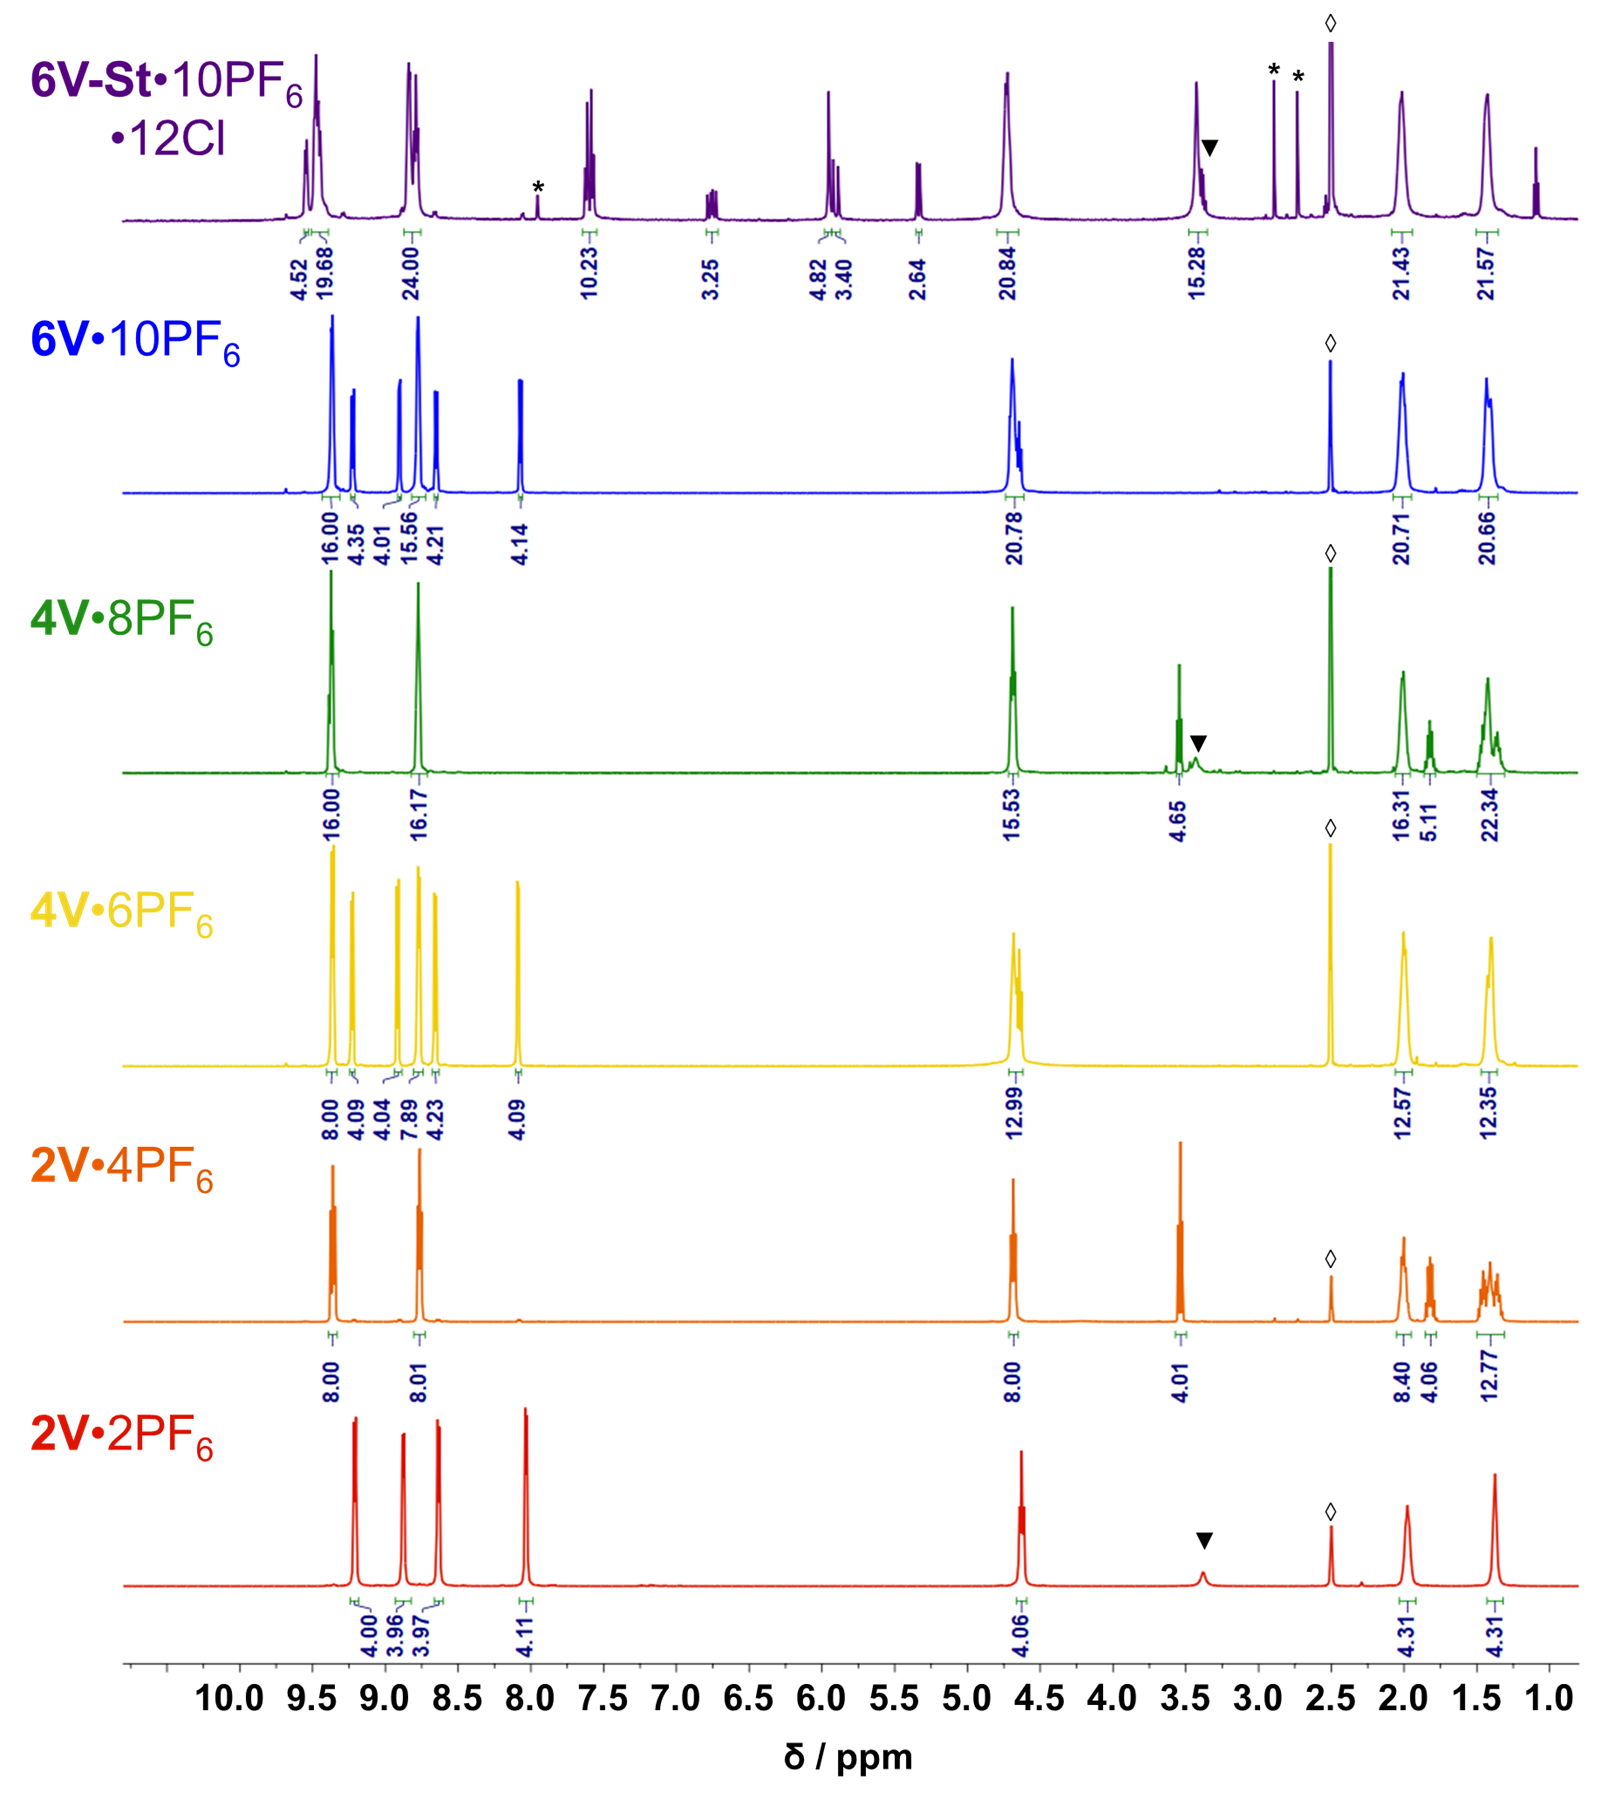
Nuclear Magnetic Resonance (1H)***

**Figure S1:** 1H NMR (500 MHz, (CD3)2SO) spectra for each iterative product in the synthesis of the crosslinker
(**6V–St•**10PF6**•**12Cl) used in the synthesis of organogels and hydrogels. *DMF ◊DMSO ▼H2O

***
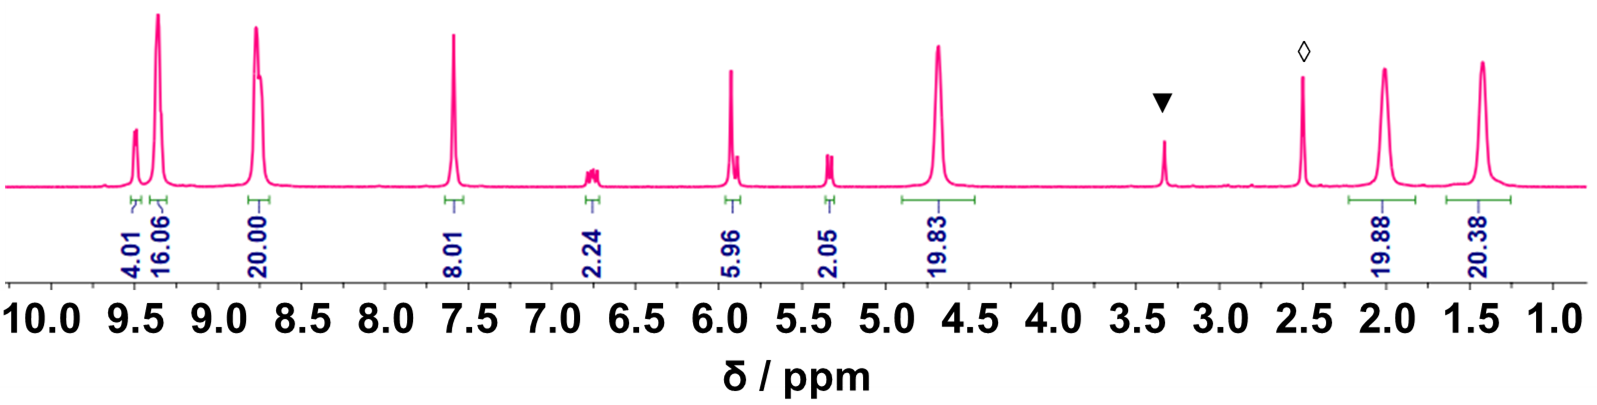
***

**Figure S2:** 1H NMR (500 MHz, (CD3)2SO) spectra for the improved synthesis of the all PF6– crosslinker,
**6V–St•**12PF6.◊DMSO ▼H2O

1. ***UV-Vis-NIR***

To prepare the photoreduced polyviologen sample for UV-Vis-NIR analysis in D2O, a solution containing 0.05 mM **6V–St•**12Cl*,*0.15 mM [Ru(bpy)3­]Cl2, and 3.00 mM TEOA in D2O was prepared in an N2-filled glovebox and irradiated with ~450 nm blue light for 20 min while stirring. The sample was transferred to a 0.7 mL, 2 mm path length quartz cuvette and stoppered with a PTFE stopper. UV-Vis-NIR scans were immediately taken at 25 °C. The aqueous sample was prepared in D2O instead of H2O to eliminate the large H—O peak in the near-IR region of the spectra. To prepare the photoreduced polyviologen sample for UV-Vis-NIR in DMF, a solution containing 0.05 mM **6V–St•**10PF­6•2Cl, 0.15 mM [Ru(bpy)3­]Cl2, and 3.00 mM TEOA in DMF was prepared in an N2-filled glovebox and irradiated with ~450 nm blue light for 20 min while stirring. The sample was transferred to a 0.7 mL, 2 mm path length quartz cuvette and stoppered with a PTFE stopper. UV-Vis-NIR scans were immediately taken at 25 °C. Additional samples were prepared according to the above procedure with a crosslinker concentration of 25.0 μM and 12.5 μM in D2O (**Figure S3a**). Additionally, the polyviologen compounds were reduced via chemical reduction in D2O and DMF with Na2S2O4 and Zn0dust, respectively (**Figure S3b**). To prepare the reduced polyviologen sample for UV-Vis-NIR in D2O, a stock solution containing 8.1 mg **6V–St•**12Cl in 3 mL of solvent (D2O) was prepared. The stock solution was diluted to 0.05 mM and 200 equiv of Na2S­2O4 was added to reduce the viologen subunits in the crosslinker. The sample was transferred to a 0.7 mL, 2 mm path length quartz cuvette and stoppered with a PTFE stopper. UV-Vis-NIR scans were immediately taken at 25 °C. To prepare the reduced polyviologen sample for UV-Vis-NIR in DMF, a stock solution containing 6.2 mg **6V–St•**10PF­6•2Cl in 2 mL of solvent (DMF) was prepared. The stock solution was diluted to 0.05 mM, an excess of Zn0dust was added, and the solution was stirred for 20 min to reduce the viologen subunits of the crosslinker. The sample was transferred to a 0.7 mL, 2 mm path length quartz cuvette and stoppered with a PTFE stopper. UV-Vis-NIR scans were immediately taken at 25 °C.
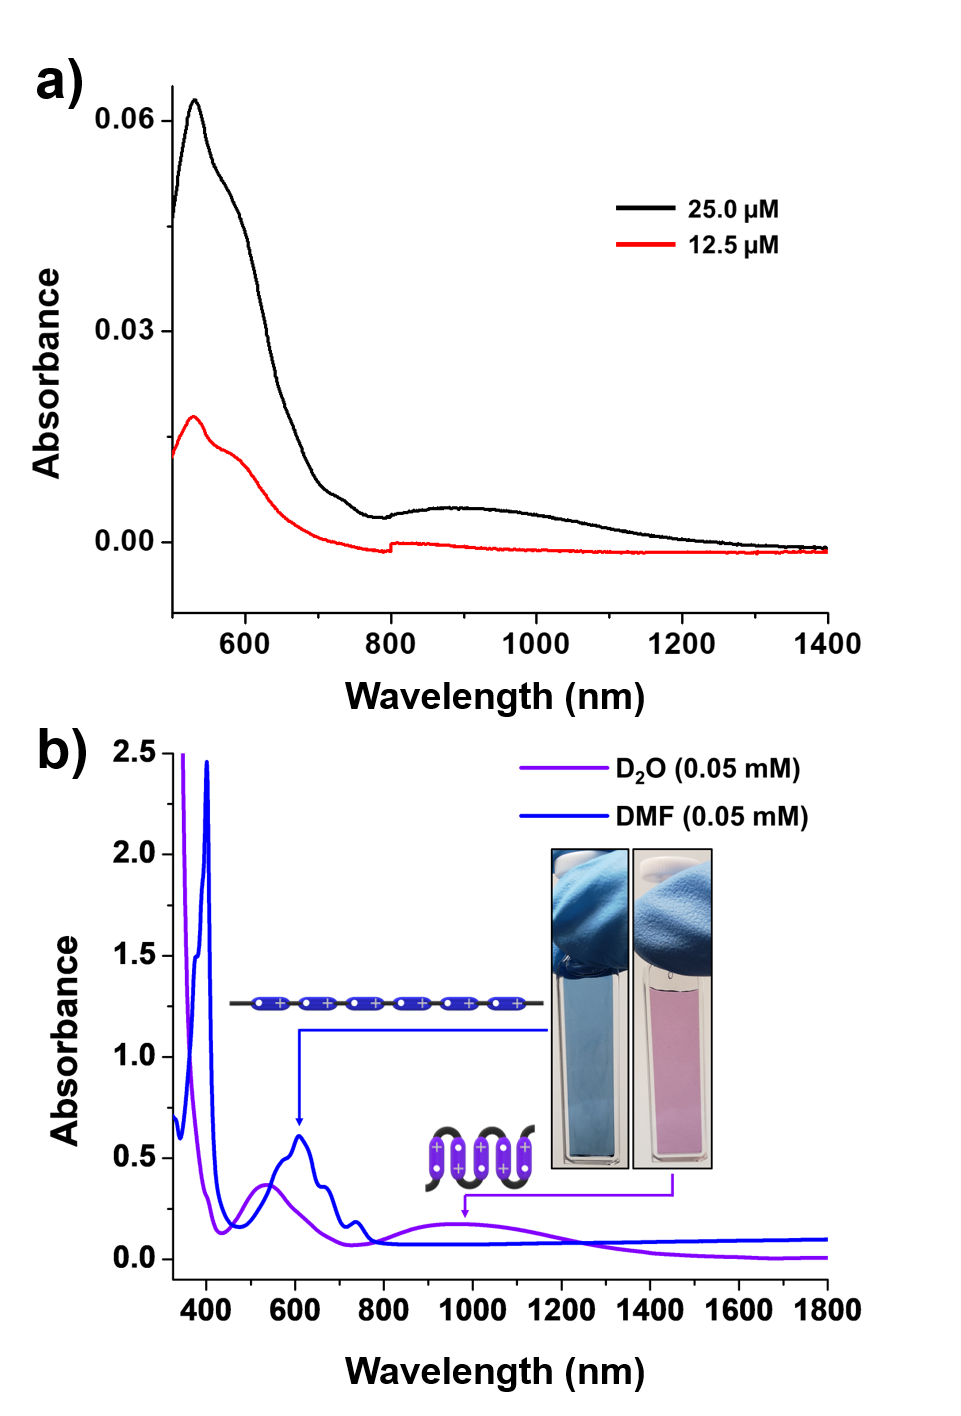


**Figure S3:** UV-Vis-NIR spectra of **a**) the photochemical reduction of the crosslinker (**6V–St**•12Cl) in D2O at 25.0 µM and 12.5 µM and **b**) the chemical reduction of the crosslinker in DMF and D2O at 0.05 mM

1. ***Gel Permeation Chromatography (GPC)***

Samples for GPC were prepared by dissolving in a minimal amount of MeCN:MeOH (50:50) and precipitating the compound as a HSO4–­ salt with a drop of concentrated H­2SO4. The precipitate was collected and washed with MeCN. The compounds were dissolved in a 0.025M solution of Na2SO4 in H­2O at a concentration of 2 mg/mL. The samples were filtered with a 0.22 μm hydrophilic disk filter into a pre-cleaned HPLC vial (no particulate contamination) before injection onto the SEC columns at 23 °C. Data traces were collected using a differential refractive index (dRI) detector in line with the SEC columns.

***
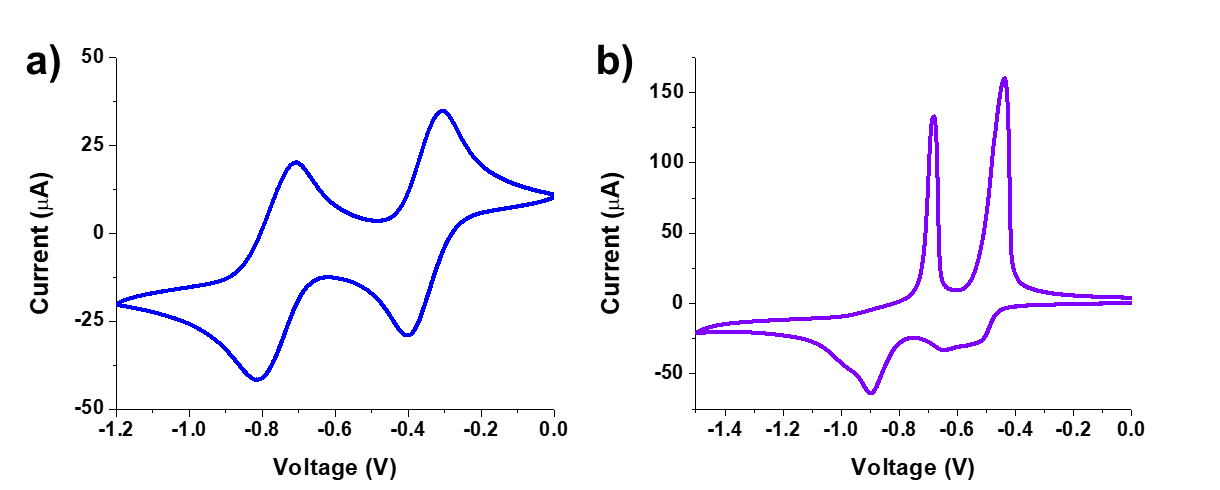
Section D. Electrochemical Characterisation***

**Figure S4:** Cyclic voltametry of **a**) **6V–St•**10PF­6•2Cl in DMF and **b**) **6V–St•**12Cl in H2O (both 1 mM) at 100 mV/s vs. Ag/AgCl.

***Section E. Thermal Characterisation***

1. ***Differential Scanning Calorimetry (DSC)***

Differential scanning calorimetry was attempted for **6V•**10PF6and **6V–St•**10PF­6•2Cl by equilibrating at 200 °C for 15 min, cooling from 200 °C to 0 °C at 10 °C per min, heating from 0 °C to 200 °C at 10 °C per min, cooling from 200 °C to 0 °C at 2 °C per min, and heating from 0 °C to 225 °C at 2 °C per min with no discernible peaks for a melting temperature (*Tm*) or glass transition temperature (*Tg­*).

1. ***
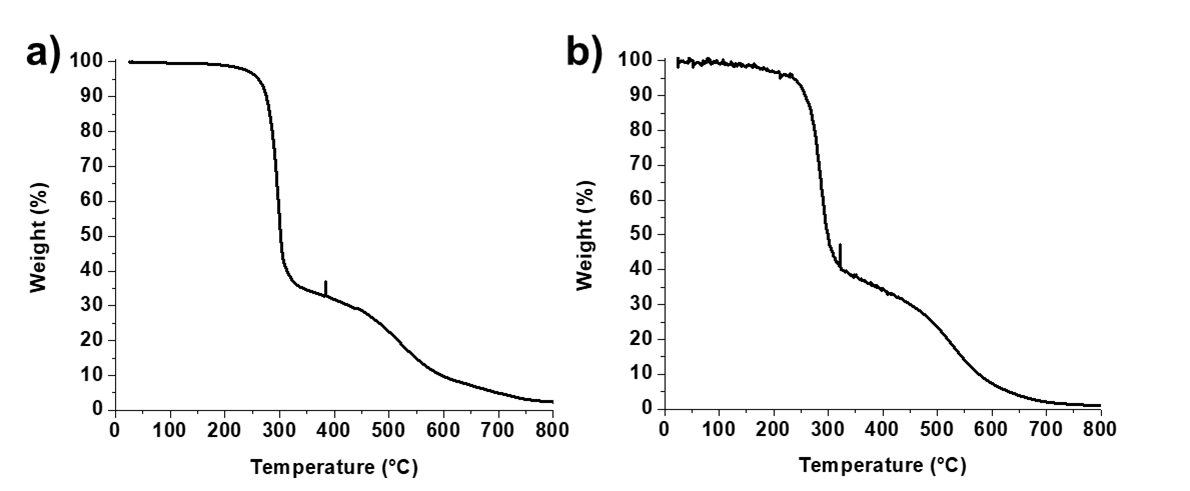
Thermogravimetric Analysis (TGA)***

**Figure S5:** Thermogravimetric analysis of **a**) **6V•**10PF6 and **b**) **6V–St•**10PF­6•2Cl

***Section F. Gel Preparation, Photochemical Reduction, Actuation, and Mechanical Properties***

1. ***General Procedure for the Preparation of Gels***
   1. ***Organogels***

| **Crosslinker** (**6V–St•**10PF6•2Cl**)** | **0.15 mol %** |
| --- | --- |
| HEA (mg) | 2006.00 |
| Crosslinker (mg) | 81.20 |
| Ammonium Persulfate (mg) | 2.80 |
| Total mass (mg) | 2090.00 |
| DMSO (mL) | 4.20 |

A modified procedureS1 was used for the synthesis of the organogels. The reagents for polymerisation (**Table S1**) were dissolved in 4.20 mL of DMSO and the solution was vortexed and sonicated to ensure complete dissolution and even mixing. The solution was then plated into a 2.54 cm × 2.54 cm clear, square mould (1.5 mL/mould) and heated in an oven at 75 °C for 1 h (**Figure S6a**). The cured gels were carefully removed from the gel mould using a spatula and placed in a solvent-resistant plastic box. The gels were then soaked in DMF for 48 h to allow for full swelling. FTIR was performed on a separate, as synthesised gel to confirm complete conversion of the crosslinker (**Figure S6b**).

**Table S1:** Reagents used for the synthesis of four gels containing 0.15 mol% **6V–St•**10PF­6•2Cl


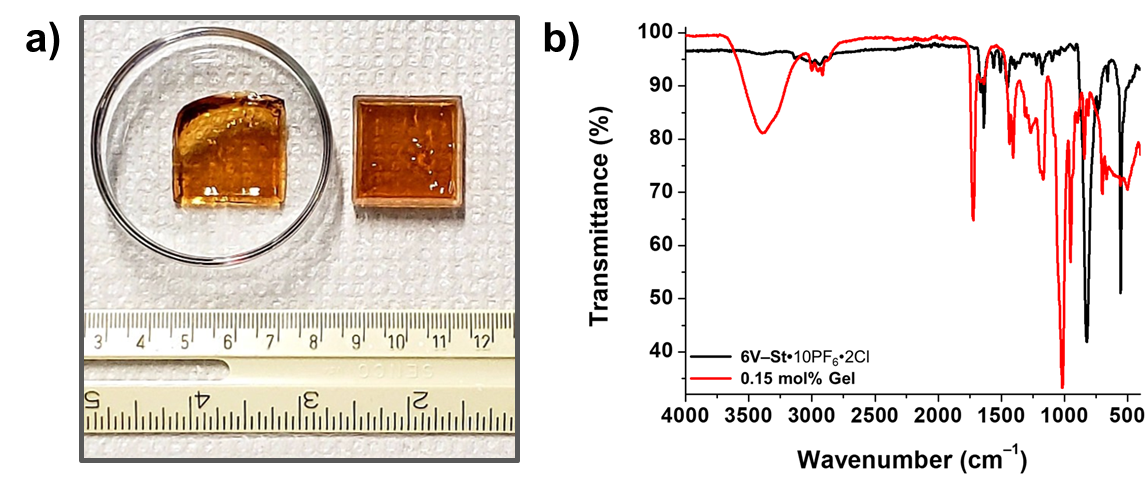
***b) Hydrogels***

**Figure S6: a**) As synthesised organogel before swelling. **b**)FT-IR of **6V–St•**10PF6•2Cl and the 0.15 mol% as-synthesised organogel. The disappearance of the sp2CH stretch at 3137 cm-1 and the C=C stretch at 1638 cm-1 indicates total conversion of **6V–St•**10PF­6•2Cl into the gel network.

The hydrogels were first synthesised as organogels with the above procedure. After swelling for 48 h, the gels were transferred into a 0.1M solution of TBACl in an 80:20 DMF:H2O mixture and were soaked for 3.5 h. The solution was decanted away from the gels and the gels were soaked in a solution of 0.1M TBACl in a 50:50 DMF:H2O mixture for 3.5 h, in a solution of 0.1M TBACl in an 20:80 DMF:H2O mixture for 3.5 h, then in a solution of 0.1M TBACl in 100% H2O for 12 h, and finally in pure H2O for 48 h to ensure complete counteranion exchange.

1. ***Calculations of Crosslinking Density, Swelling ratio, and Mc***

The volumetric swelling ratioS2, Q, was calculated as follows: Q =, where ρHEA is the density of poly(2-hydroxyethyl acrylate) at 298 K (1.30 g/mL, average calculated dataS3), ρDMF is the density of DMF at 298 K (0.948 g/mL) , *Ms* is the mass of the swollen gel in DMF, and *Md* is the mass of the dried gel. The crosslinking densityS4 was calculated as follows: Crosslinking Density = , where *G* is the equilibrium shear modulus ( from oscillatory shear rheology at 1 rad s–1 and 1% strain), R is the gas constant (8.314459848 ), and T = 298K, in units of . The average molecular weight between crosslinksS5 ­(*M­c*) was calculated as follows: *Mc* = where ρgel is the density of the gel ((*M­­d* / (*Ms*–*Md*)) * ρDMF) in , R is the gas constant (8.314459848 x 106 ), and T = 298 K, in units of .

| Crosslinker  (***6V–St•****10PF6•2Cl)* | Q  (Swelling Ratio) | *G*  (Pa) | Crosslinking Density (mol/m3) | *Mc*  (kDa) |
| --- | --- | --- | --- | --- |
| 0.15 mol% | 40.55 | 1169 | 1.62 | 69.64 |

1. ***As-Synthesised, Swollen Gel Rheology***

Gels synthesised as shown above were swollen in DMF for 48 h. A 20 mm disc was punched out of the swollen gels and the rheological data (**Figure S9**) was acquired.

1. ***Photochemical Reduction of Gels: Procedure, Kinetics, and Rheology***


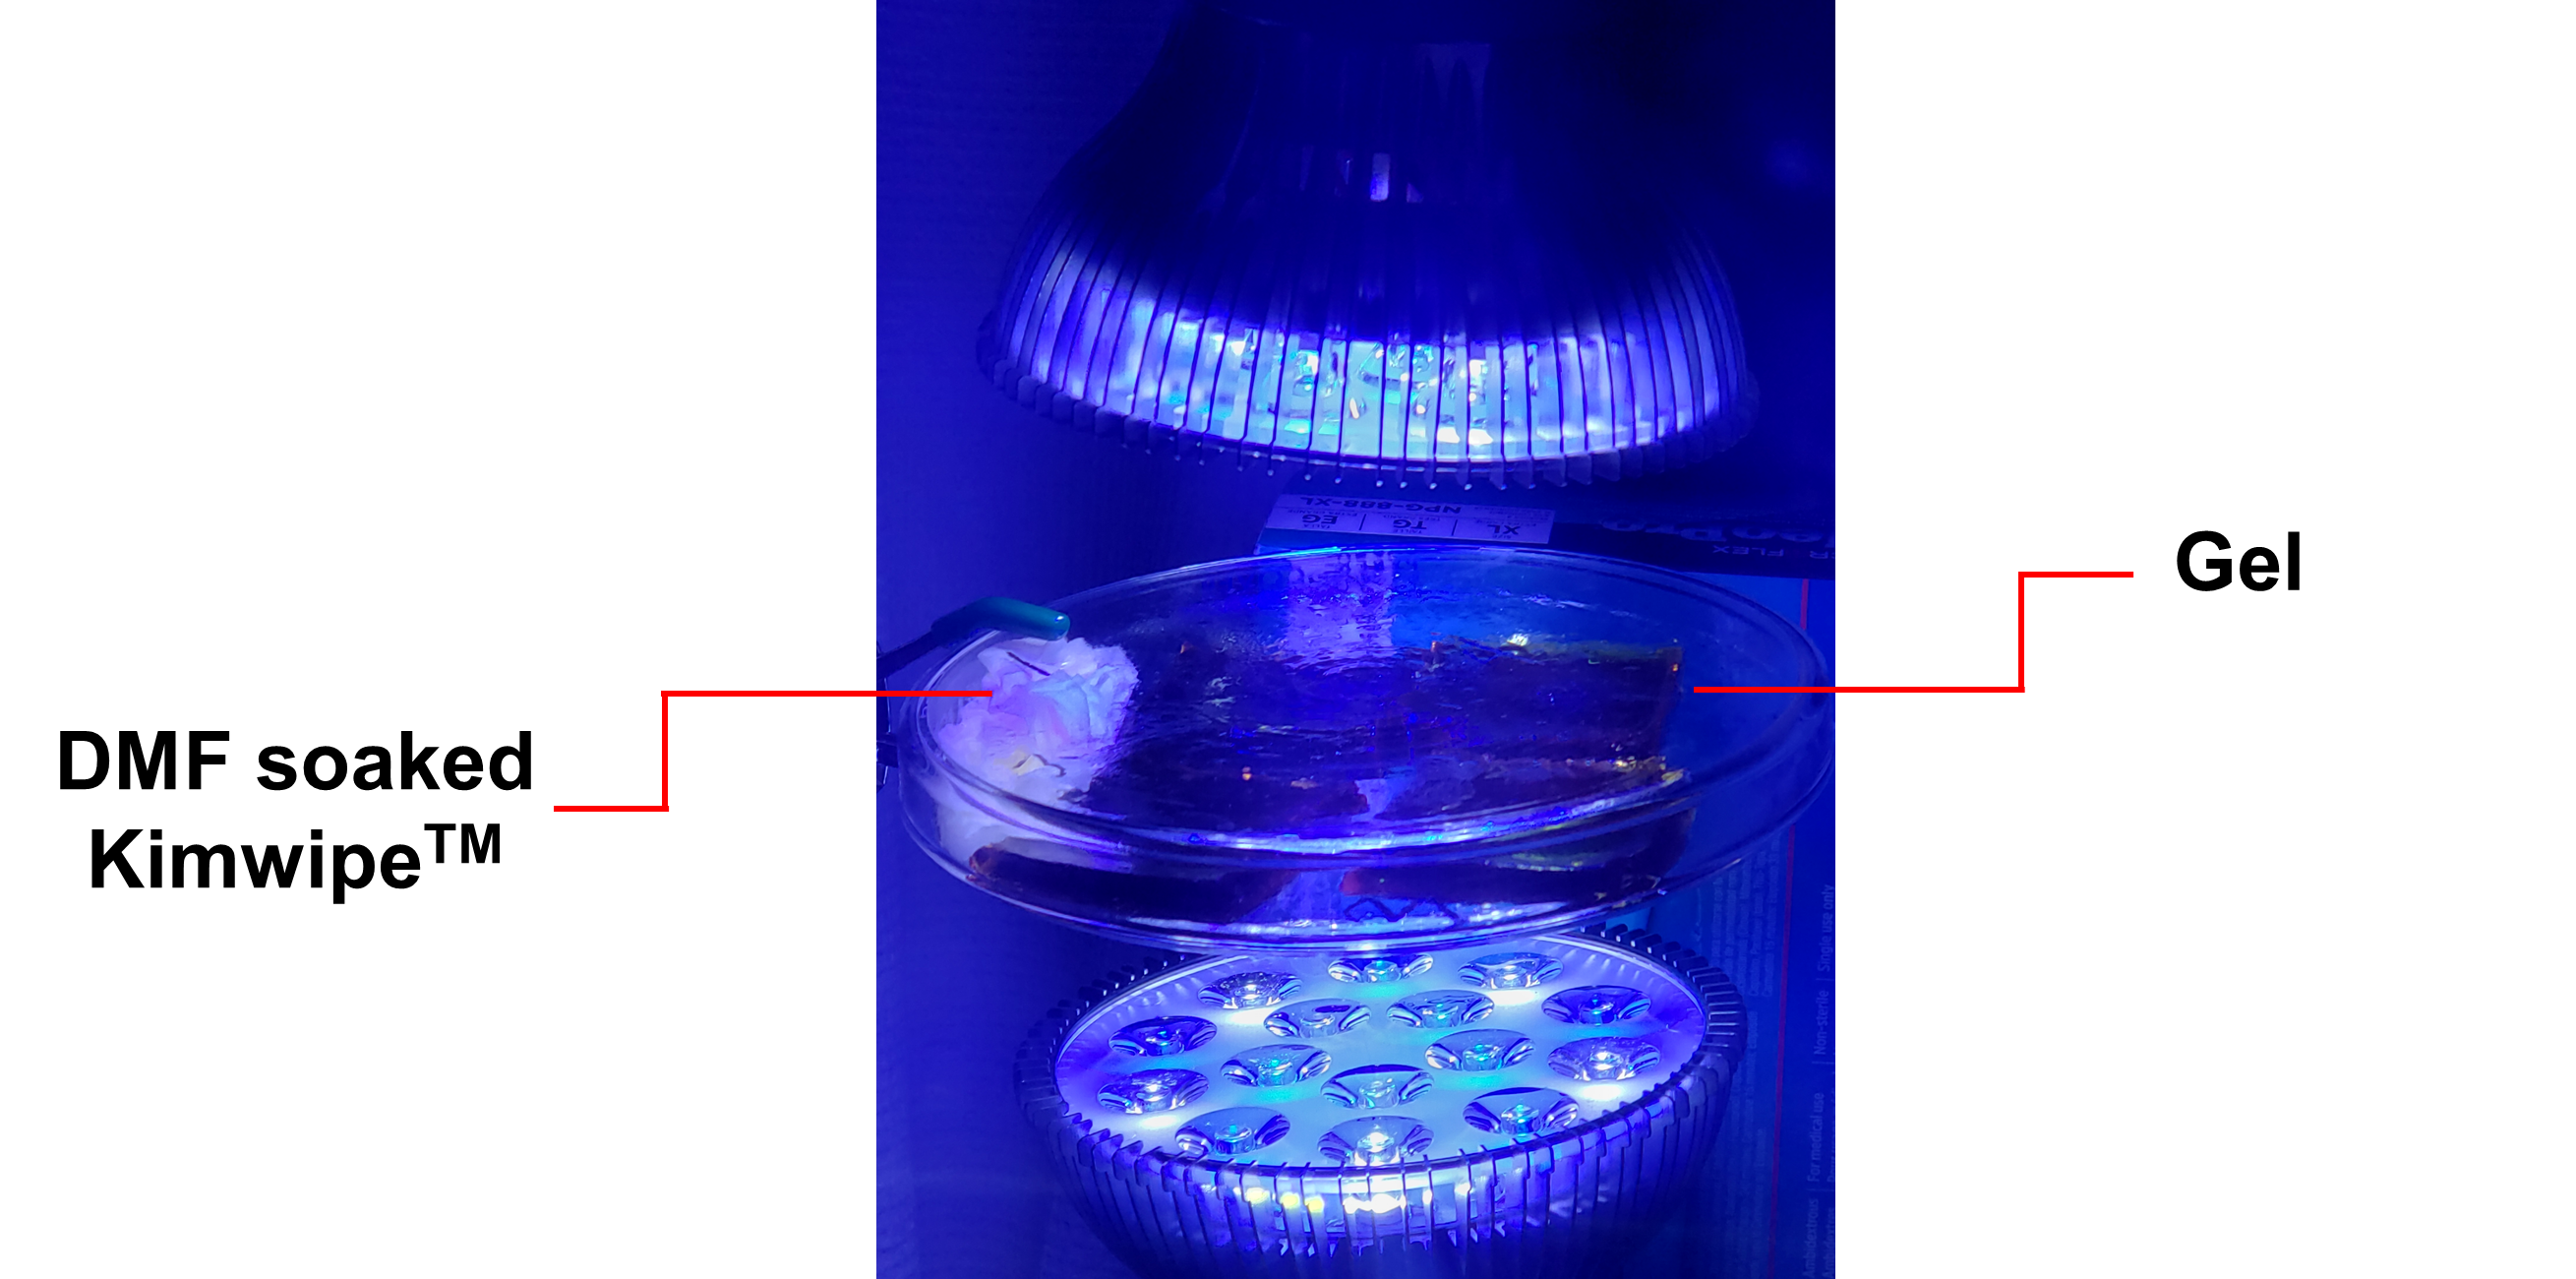
All kinetics experiments were performed in either quadruplicate or triplicate inside of an N2-filled glovebox. The gels were prepared as described above (organogels and hydrogels) and were swollen for an additional 23 h in a degassed solution of 0.15 mM [Ru(bpy)3]Cl2 and 3.00 mM triethanolamine (TEOA) in either DMF or H2O inside the glovebox. The average (n = 3 or 4) gel volume at t = 0 was 10.97 cm3 for the organogels and 4.30 cm3for the hydrogels. The gels were then removed from solution and placed in a 14 cm diameter glass petri dish. An H2O or DMF-soaked Kimwipe was also placed inside the petri dish, which was covered by a lid. The gels were irradiated with ~450 nm light from the top and bottom for 4 h, maintaining a 5.5 cm distance between the gel and the light source (**Figure S7**) with volume measurements taken at regular intervals (**Figure S8**). After irradiation, the gels were removed from the light source and a 20 mm diameter disc was punched out of the material. The gel discs were placed into an airtight container and transported for rheological experiments, which were performed to obtain the reduced/contracted rheological data on the gels. The resulting discs were oxidized and swollen in either DMF or H2O. A new 20 mm diameter disc was punched out from the resulting reswollen gels and the oxidized rheological data were recorded (**Figure S9**). For the control, the same protocol was repeated on a swollen triplicate set of organogels, except the addition of [Ru(bpy)3]Cl2/TEOA in the DMF or H2O solutions.

**Figure S7:** Experimental setup for photoirradiation kinetics experiments. Square gels in a large, glass petri dish were irradiated from top and bottom approximately 5.5 cm away from the gels with a 450 nm light source.

***
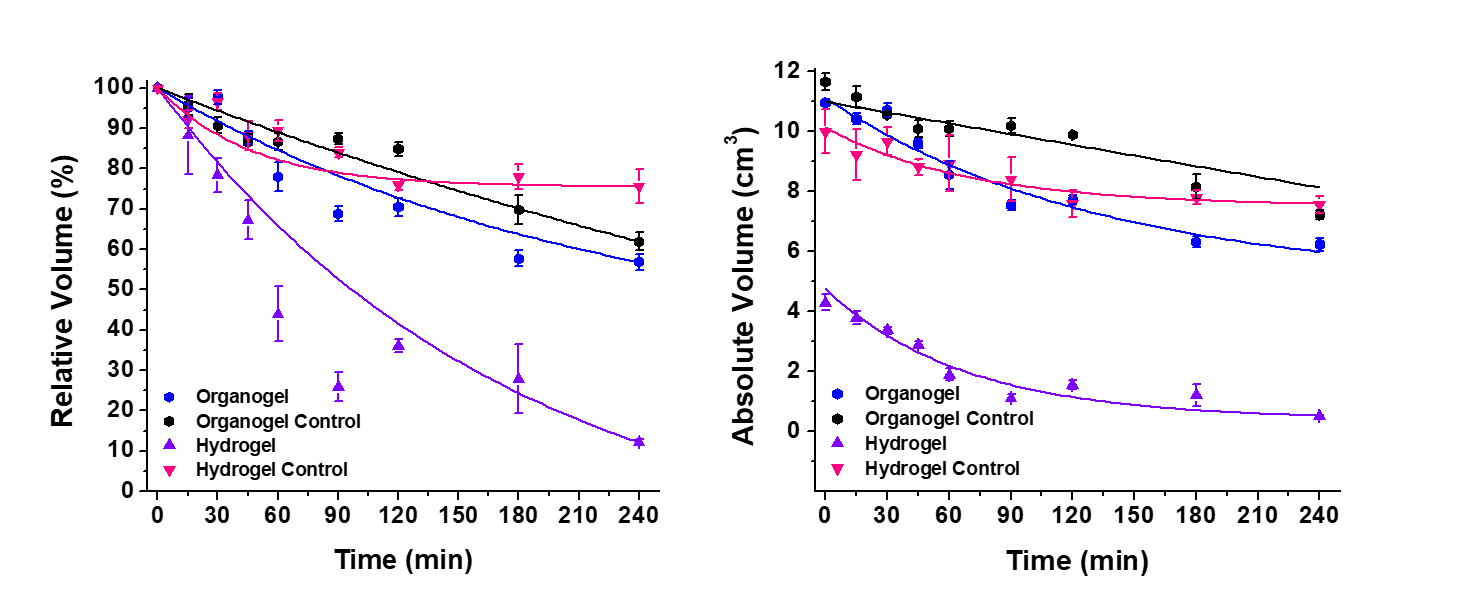
***

**Figure S8:** Kinetic plot of **a**) the relative volume change and **b**) the absolute volume change during the 4 h irradiation period for each indicated gel.


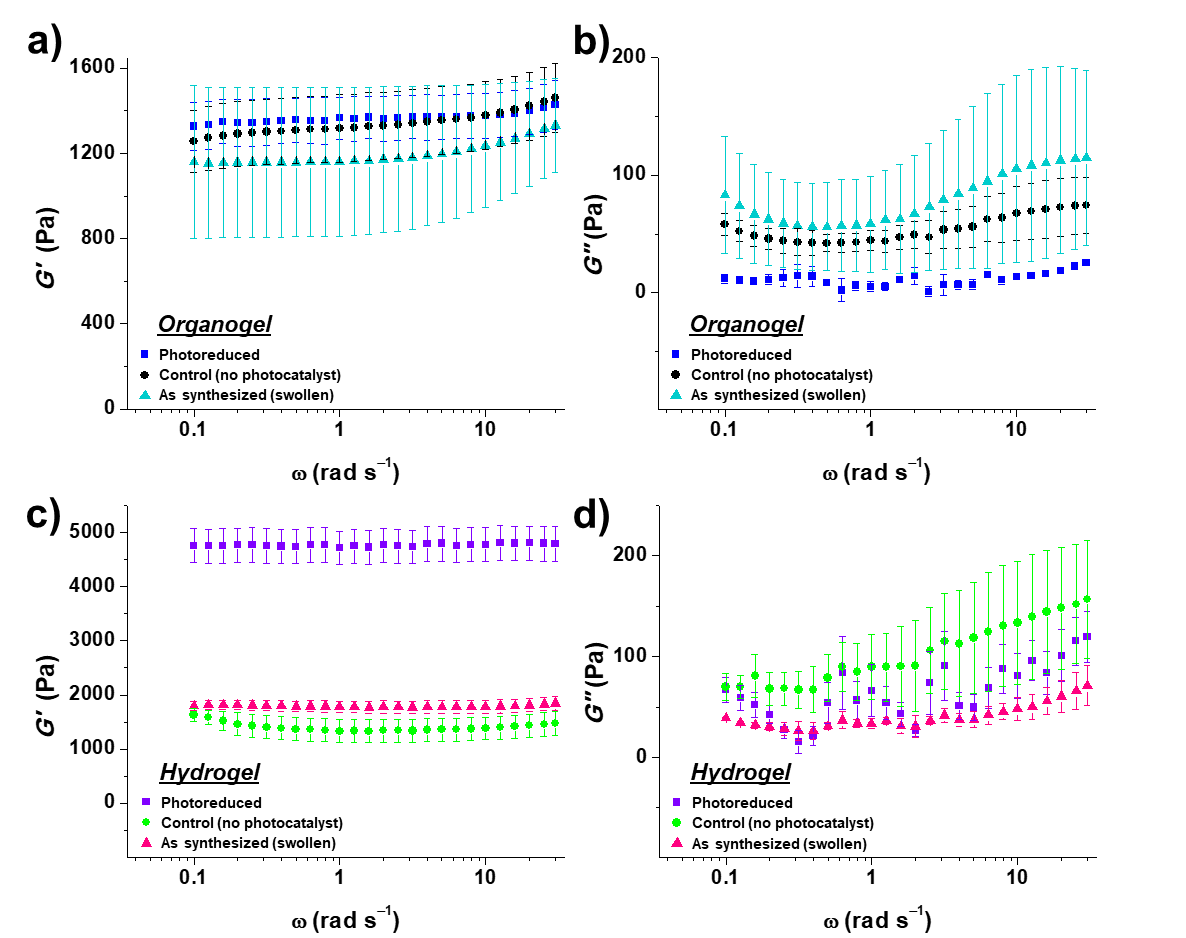
***Section G. References***

**Figure S9: a**) Storage modulus (*Gʹ*) of the organogels **b**) loss modulus (*Gʺ*) of the organogels **c**) storage modulus (*Gʹ*) of the hydrogels **d**) loss modulus (*Gʺ*) of the hydrogels

1. Liu, X.; Zhang, Q.; Duan, L.; Gao, G. Bioinspired Nucleobase-Driven Nonswellable Adhesive and Tough Gel with Excellent Underwater Adhesion. *ACS Appl. Mater. Interfaces* **2019**, *11*, 6644–6651.
2. Bryant, S. K; Chowdhury, T. T.; Lee, D. A.; Bader, D. L.; Anseth, K.S. Crossliking Density Influences Chrondrocyte Metabolism in Dynamically Loaded Photocrosslinked Poly(ethylene glycol) Hydrogels. *Annals of Biomedical Engineering*, **2004**, *32*, 407–417.
3. Poly(2-hydroxyethyl acrylate). CROW Polymer Database. http://polymerdatabase.com/polymers/

poly2-hydroxyethyl%20acrylate.html

1. DeForest, C. A; Anseth, K. S. Advances in Bioactive Hydrogels to Probe and Direct Cell Fate. *Annu. Rev. Chem. Biomol. Eng.* **2012**, *3*, 421–444.
2. Andreopoulos, A. G. Properties of poly(2-hydroxyethyl acrylate) networks. *Biomaterials* **1989**, *10*, 101–104.
